# Supplementary material
Source: PubMed Central journal article supplement (PMC10125309)
Supplement: bg2c00020_si_001.pdf [file bg2c00020_si_001.pdf]

## Supporting Information for

### **In vitro Demonstration of Human Lipoyl Synthase (LIAS) Catalytic Activity in the Presence of NFU1**

*Douglas M. Warui<sup>‡</sup>, Debangsu Sil<sup>‡</sup>, Kyung-Hoon Lee<sup>‡</sup>, Syam Sundar Neti<sup>‡</sup>, Olga A. Esakova<sup>‡</sup>, Hayley L.  
Knox, Carsten Krebs<sup>\*.‡.§</sup>, and Squire J. Booker<sup>\*.‡.§.#</sup>*

Departments of <sup>‡</sup>Chemistry and of <sup>§</sup>Biochemistry and Molecular Biology, and the <sup>#</sup>Howard Hughes Medical Institute, The Pennsylvania State University, University Park, Pennsylvania 16802, USA.

\*To whom correspondence should be addressed: Squire J. Booker ([sjb14@psu.edu](mailto:sjb14@psu.edu)); Carsten Krebs ([ckrebs@psu.edu](mailto:ckrebs@psu.edu))

## Table of Contents

|                                                                                             |       |
|---------------------------------------------------------------------------------------------|-------|
| 1) DNA and protein sequences used in this study.....                                        | S3-S7 |
| 2) Mössbauer spectra of LIAS.....                                                           | S8    |
| 3) Parameters used to simulate Mossbauer spectra of the [3Fe-4S] <sup>0</sup> Cluster ..... | S9    |
| 4) EPR spectra of NFU1.....                                                                 | S9    |
| 5) Activity plots of LIAS, LIAS with NFU1, BOLA3, ISCU, ISCA1&ISCA2, GLRX5.....             | S10   |
| 6) LC-MS gradient and MRM conditions for product analysis.....                              | S11   |
| 7) References.....                                                                          | S11   |

## **DNA and amino acid sequences**

The following are the codon-optimized DNA and the corresponding amino acid sequences of the various proteins (without their respective mitochondrial targeting sequences as indicated respectively) used in this study.

### **BOLA3 isoform 1 (a. a 27 – 107) optimized DNA sequence (UniProtKB Q53S33)**

GCAACCCAGACCGAAGGTGAACTGCGTGTTACCCAGATTCTGAAAGAAAAATTTCCGCGTG  
CAACCGCCATTAAAGTTACCGATATTAGCGGTGGTTGTGGTGCAATGTATGAAATCAAAT  
CGAAAGCGAAGAATTTAAAGAAAAGCGTACCGTTCAGCAGCATCAGATGGTTAATCAGGC  
ACTGAAAGAAGAGATCAAAGAAATGCATGGTTTGCGCATTTTTACCAGCGTTCCGAAACGT

### **BOLA3 protein sequence**

A T Q T E G E L R V T Q I L K E K F P R A T A I K V T D I S G G C G A M Y E I K I E S E E F K E  
K R T V Q Q H Q M V N Q A L K E E I K E M H G L R I F T S V P K R

### **ISCA1 isoform 1 (a. a 13 - 129) optimized DNA sequence (UniProtKB Q9BUE6)**

GTTAGCAAACGTAAACTGCAGCCGACACGTGCAGCACTGACCCTGACACCGAGCGCAGTT  
AACAAAATCAAACAGCTGCTGAAAGATAAACCGGAACATGTTGGTGTTAAAGTTGGTGTTT  
GTACCCGTGGTTGTAATGGTCTGAGCTATACCCTGGAATATAACAAAACCAAAGGCGATTC  
AGATGAAGAGGTTATTCAGGATGGTGTGCGTGTGTTTATTGAAAAAAAAAGCACAGCTGACC  
CTGCTGGGCACCGAAATGGATTATGTTGAAGATAAACTGAGCAGCGAGTTCGTGTTTAATA  
ACCCGAACATTAAAGGCACCTGTGGTTGTGGTGAAAGCTTTAACATTTAA

### **ISCA1 protein sequence**

VSKRKLQPTRAALTLTPSAVNKIKQLLKDKPEHVGKVGVRTRGCNGLSYTLEYTKT  
KGDSDEEVIQDGVRVFIEKKAQLTLLGTEM DYVEDKLSSEFVFNNPNIKGTCGCGE  
SFNI

**ISCA2 isoform 1 (9 – 154) optimized DNA sequence (UniProtKB Q86U28)**

CTG ACC GCA GCA ACC CAG CGT GCA GTT ACC CCG TGG CCT CGT GGT CGT CTG CTG ACC GCA AGT  
CTG GGT CCG CAG GCA CGT CGT GAA GCA AGC AGC AGC AGT CCG GAA GCC GGT GAA GGT CAG ATT  
CGT CTG ACC GAT AGC TGT GTT CAG CGT CTG CTG GAA ATT ACC GAA GGT AGC GAA TTT CTG CGT  
CTG CAG GTT GAA GGT GGT GGT TGT AGC GGT TTT CAG TAT AAA TTC AGC CTG GAT ACC GTG ATT  
AAT CCG GAT GAT CGT GTT TTT GAA CAA GGT GGT GCA CGT GTT GTT GTT GAT AGC GAT AGC CTG  
GCA TTT GTT AAA GGT GCA CAG GTT GAT TTT AGC CAA GAA CTG ATT CGT AGC AGC TTT CAG GTT CTG  
AAT AAT CCG CAG GCG CAG CAG GGT TGT AGC TGT GGT AGC AGT TTT AGC ATT AAA CTG

**ISCA2 protein sequence**

LTAATQRAVTPWPRGRLLTASLGPQARREASSSSPEAGEGQIRLTDSCVQRLLLEITEGSEFLRLQ  
VEGGGCSGFQYKFSLDTVINPDDR VFEQGGARVVVDSDSLAFVKGAQVDFSQELIRSSFQVLN  
NPQAQQGCSCGSSFSIKL

**ISCU isoform 1 (a. a 35 – 167) optimized DNA sequence (UniProtKB Q9H1K1)**

TATCATAAAAAAGTGGTGGATCACTACGAGAATCCGCGTAATGTTGGTAGCCTGGATAAAA  
CCAGCAAAAATGTTGGCACCGGTCTGGTTGGTGCACCGGCATGTGGTGATGTTATGAAACT  
GCAGATTCAGGTGGATGAGAAAGGCAAAATTGTTGATGCACGCTTTAAACCTTTGGTTGT  
GGTAGCGCAATTGCAAGCAGCAGCCTGGCAACCGAATGGGTTAAAGGTAAAACCGTTGAA  
GAAGCACTGACCATCAAAAATACCGATATTGCCAAAGA ACTGTGTCTGCCTCCGGTTAAAC  
TGCATTGTAGCATGCTGGCAGAAGATGCAATTAAGCAGCACTGGCAGATTACAAACTGAA  
ACAAGAACCGAAAAAAGGCGAAGCCGAGAAAAAA

### **ISCU protein sequence**

YHKKVVDHYENPRNVGSLDKTSKNVGTGLVGAPACGDVMKLQIQVDEKGGKIVDARFKTFG  
CGSAIASSSLATEWVKGKTVEEALTIKNTDIAKELCLPPVKLHCSMLAEDAIIKAALADYKCLKQE  
PKKGAEKK

### **GLRX5 (a. a 32 – 157) optimized DNA sequence (UniProtKB Q86SX6)**

GCCGGTAGTGGTGCAGGCGGTGGCGGTAGCGCAGAACAGCTGGATGCACTGGTTAAAAAA  
GATAAAGTTGTGGTGTTCCTGAAAGGTACACCGAACAGCCGCAGTGTGGTTTTAGCAATG  
CAGTTGTTTCAGATTCTGCGTCTGCATGGTGTGCGTGATTATGCAGCATATAATGTTCTGGAT  
GATCCGGAAGTGCATCAGGGTATTAAGATTATAGCAATTGGCCGACCATTCCGCAGGTTT  
ATCTGAATGGTGAATTTGTTGGTGGTTGCGATATTCTGCTGCAGATGCATCAGAATGGTGAT  
CTGGTTGAAGAACTGAAAAAACTGGGTATTCATAGCGCACTGCTGGATGAAAAAAAAGAT  
CAGGATAGCAAATA

### **GLRX5 protein sequence**

AGSGAGGGGSAEQLDALVKKDKVVVFLKGTPEQPQCFSNAVQILRLHGVVDYAAYNVLD  
DPELRQGIKDYSNWPTIPQVYLNGEFVGGCDILLQMHQNGDLVEELKKLGIHSALLDEKKDQD  
SK

### **LIAS isoform 1 (a. a 28 – 372) optimized DNA sequence (UniProtKB O43766)**

CTGAGCAGCCTGCCGATAAAAAGAAAGAACTGCTGCAGAATGGTCCGGATCTGCAGGAT  
TTTGTTAGCGGTGATCTGGCGATCGTAGCACCTGGGATGAGTATAAAGGTAATCTGAAACG  
TCAGAAAGGTGAACGTCTGCGTCTGCCTCCGTGGCTGAAAACCGAAATTCCGATGGGTAAA  
AACTACAACAACTGAAAAATACCCTGCGCAATCTGAATCTGCATACCGTTTGTGAAGAAG  
CACGTTGTCCGAATATTGGTGAATGTTGGGGTGGTGGTGAATATGCAACCGCAACCGCCAC  
CATTATGCTGATGGGTGATACCTGTACACGTGGTTGTCGTTTTTGTAGCGTTAAAACCGCAC

GTAATCCGCTCCGCTGGATGCAAGCGAACCGTATAATACCGCAAAGCAATTGCCGAATG  
GGGCTTAGATTATGTTGTTCTGACCAGCGTTGATCGTGATGATATGCCGGATGGTGGTGCA  
GAACATATTGCAAAAACCGTTAGCTATCTGAAAGAACGCAATCCGAAAATTCTGGTTGAAT  
GTCTGACACCGGATTTTCGTGGTGTCTGAAAGCCATTGAAAAAGTTGCACTGAGCGGTCT  
GGATGTTTATGCACATAATGTTGAAACCGTGCCGGAAGTGCAGAGCAAAGTTCGTGATCCG  
CGTGCAAATTTTGATCAGAGCCTGCGTGTTCTGAAACATGCAAAAAAAGTTCAGCCGGATG  
TGATTAGCAAACCAGCATTATGTTAGGTCTGGGCGAAAATGATGAACAGGTTTATGCAAC  
CATGAAAGCACTGCGTGAAGCAGATGTGGATTGTCTGACCCTGGGCCAGTATATGCAGCCG  
ACACGTCGTCATCTGAAAGTTGAAGAATATATCACCCCTGAGAAGTTCAAGTATTGGGAAA  
AAGTGGGTAATGAACTGGGCTTTCATTATACCGCAAGCGGTCCGCTGGTTCGTAGCAGCTA  
TAAAGCCGGTGAATTTTTTCTGAAAAACCTGGTGGCAAACGCAAACCAAAGATCTG

**LIAS protein sequence**

LSSLPDKKKELLQNGPDLQDFVSGDLADRSTWDEYKGNLKRQKGERLRLPPWLKTEIPMGKN  
YNKLNKNTLRNLNLHTVCEEARCPNIGECWGGGEYATATATIMLMGDTCTRGCRFCSVKTARN  
PPPLDASEPYNTAKAIAEWGLDYVVLTSVDRDDMPDGGAEHIAKTVSYLKERNPKILVECLTPD  
FRGDLKAIEKVALSGLDVYAHNVETVPELQSKVRDPRANFDQSLRVLKHAKKVQPDVISKTSI  
MLGLGENDEQVYATMKALREADVDCLTLGQYMQPTRRHLKVEEYITPEKFKYWEKVGNELG  
FHYTASGPLVRSSYKAGEFFLKNLVAKRKTDL

**NFU1 (a. a 59 – 254) optimized DNA sequence (UniProtKB Q9UMS0)**

TTTATTCAGACCCAGGATACCCCGAATCCGAATAGCCTGAAATTCATTCCGGGTAAACCGG  
TTCTGGAAACCCGTACCATGGATTTTCCGACACCGGCAGCAGCATTTCGTAGTCCGCTGGC  
ACGTCAGCTGTTTCGTATTGAAGGTGTTAAAAGCGTTTTTTTTTCGGTCCGGATTTTATCACCG  
TGACCAAAGAAAATGAAGAACTGGATTGGAATCTGCTGAAACCGGATATTTATGCCACCAT  
CATGGATTTCTTTGCAAGCGGTCTGCCGCTGGTTACCGAAGAAACCCCGAGCGGTGAAGCA

GGTAGCGAAGAGGATGATGAAGTTGTTGCAATGATTAAGAAGCTGCTGGATACCCGTATTC  
GTCCGACCGTTCAAGAGGATGGTGGTGTGTTATCTATAAAGGTTTTGAAGATGGCATCGT  
GCAGCTGAAACTGCAGGGTAGCTGTACCAGCTGTCCGAGCAGCATTATTACCCTGAAAAAT  
GGCATTCAGAACATGCTGCAGTTTTATATCCCGGAAGTGGAAGGTGTTGAACAGGTTATGG  
ATGATGAGTCCGATGAAAAAGAAGCAAATAGCCCG

**NFU1 protein sequence**

FIQTQDTPNPNSLKFIPGKPVLETRTMDFPTPAAAFRSPLARQLFRIEGVKS VFFGPDFITVTKENE  
ELDWNLLKPDYATIMDFFASGLPLVTEETPSGEAGSEEDDEVVAMIKELLDTRIRPTVQEDGGD  
VIYKGFEDGIVQLKLQGSCTSCPSSIITLKNGIQNMLQFYIPEVEGVEQVMDDDESDEKEANSP

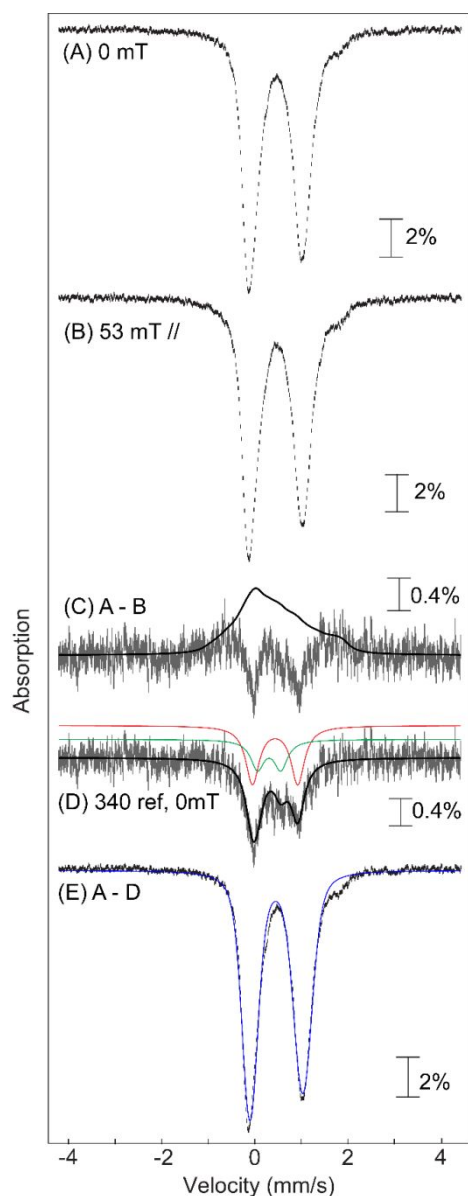

**Figure S1.** 4.2 K Mössbauer spectra of LIAS in (A) absence and (B) presence of a 53 mT external magnetic field applied parallel of the direction of propagation of  $\gamma$  beam. (C) [0 – 53 mT] difference spectrum (vertical bars), and simulation of  $[3\text{Fe-4S}]^0$  cluster in 53 mT using the parameters listed in **Table S1** and scaled to  $\sim 10\%$  of total  $^{57}\text{Fe}$  absorption (black line). (D) Zero-field reference spectrum of the  $[3\text{Fe-4S}]^0$  cluster (vertical bars) generated by addition of the features of the  $[3\text{Fe-4S}]^0$  cluster in a 53 mT field to the [0 – 53 mT] difference spectrum. Black line is the simulation of the  $[3\text{Fe-4S}]^0$  cluster in zero field with parameters from **Table S2**. The red and green lines (in 2:1 intensity ratio) represents the



individual contributions from the three Fe sites. (E) Zero field spectrum of LIAS (vertical bars) after subtracting the features of the  $[3\text{Fe-4S}]^0$  cluster ( $\sim 10\%$ ) from spectrum A. The blue line shows the features associated with the  $[4\text{Fe-4S}]^{2+}$  cluster.

**Table S1:** Spin Hamiltonian Parameters for Simulation of Mössbauer Spectra of  $[3\text{Fe-4S}]_0$  Clusters

| ZFS parameters                   |                          | $\delta$ (mm/s) | $\Delta E_Q$ (mm/s) | $\eta$ | $\beta$ (deg) <sup>a</sup> | $A/g_n\beta_n$ (T)    |
|----------------------------------|--------------------------|-----------------|---------------------|--------|----------------------------|-----------------------|
| $D_{S=2} = -4.0 \text{ cm}^{-1}$ | $\text{Fe}^{\text{III}}$ | 0.31            | -0.55               | -2.0   | 16                         | (+10.0, +11.8, +11.8) |
| $(E/D)_{S=2} = 0.23$             | $\text{Fe}_2^{2.5+}$     | 0.44            | 0.98                | 0.4    | 25                         | (-13.9, -13.9, -11.4) |

<sup>a</sup>Euler angle  $\beta$  that rotates the electric field gradient tensor into the frame of the zero-field splitting tensor

**Table S2.** Different Sets of Mössbauer Parameters for Simulation of the Zero-Field Reference Spectrum of the  $[3\text{Fe-4S}]^0$  Cluster

| Site                               | $\delta$ (mm/s) | $\Delta E_Q$ (mm/s) |
|------------------------------------|-----------------|---------------------|
| 1 (trace D, Figure SX, green line) | 0.31            | 0.50                |
| 2 (trace D, Figure SX, red line)   | 0.44            | 0.97                |

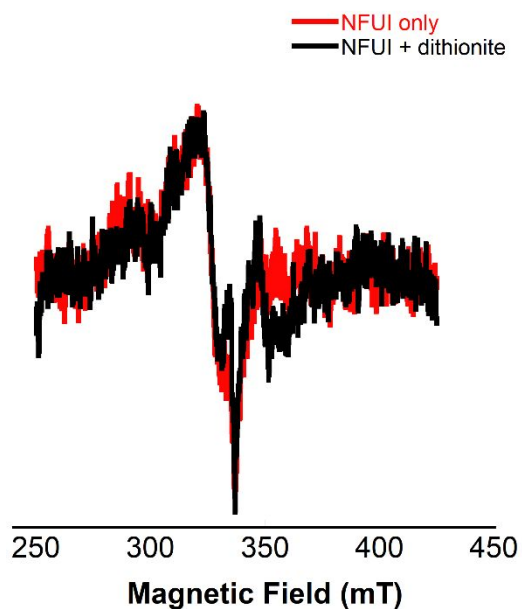

**Figure S2.** EPR spectra of 400  $\mu\text{M}$  NFU1, unreduced (red), and reduced with 4 mM dithionite (black), showing no apparent differences or any distinctive features. The spectra were collected at 10 K, 10 mW microwave power, and 0.2 mT modulation amplitude.

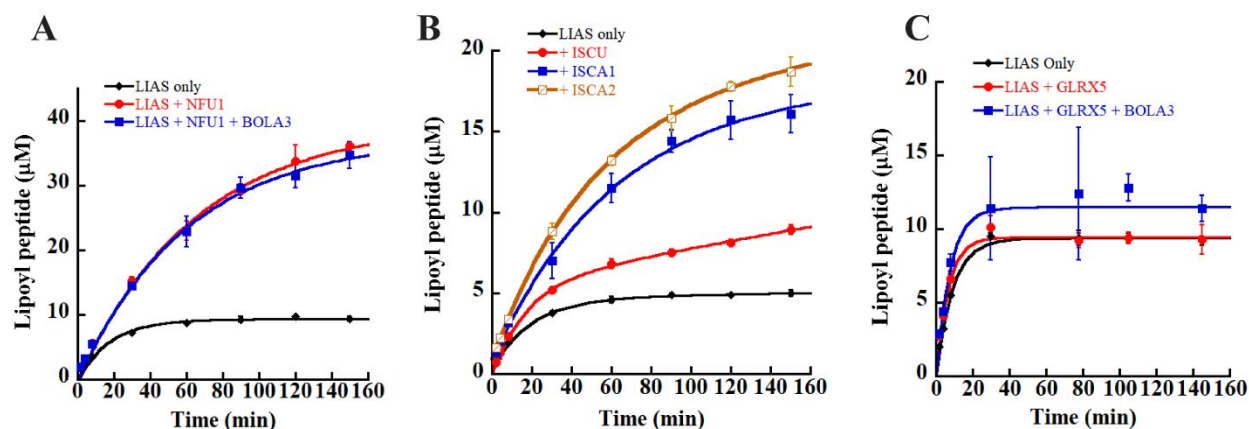

**Figure S3.** In vitro activity results of 10  $\mu\text{M}$  LIAS; in the presence of 200  $\mu\text{M}$  NFU1 and 200  $\mu\text{M}$  NFU1 and 200  $\mu\text{M}$  BOLA3 (**A**), in the presence of 200  $\mu\text{M}$  ISCU, 200  $\mu\text{M}$  ISCA1 or 200  $\mu\text{M}$  ISCA2 (**B**), in the presence of 200  $\mu\text{M}$  GLRX5 and 200  $\mu\text{M}$  each of GLRX5 and BOLA3 (**C**). The inclusion of NFU1 (red trace) in the LIAS reaction allows for multiple turnovers of the lipoyl product while inclusion of BOLA3 (blue trace) in a reaction that also contained NFU1 showed no notable effect (**A**). When ISCU (red trace) was included in LIAS activity assays, a slight increase in lipoyl product to a full turnover was observed, inclusion of ISCA1 (blue trace) caused an increase in lipoyl product to  $\sim 0.5$  additional turnover while the inclusion of ISCA2 (orange trace) led to an increase of lipoyl product to  $\sim 1$  additional turnover (**B**). The inclusion of GLRX5 (red trace) alone or in combination with BOLA3 (blue trace) showed no observable effect on LIAS activity (**C**). Unless otherwise noted, all the activity assays included in their final concentrations; 350  $\mu\text{M}$  octanoyl peptide substrate, 0.75 mM SAM and 10  $\mu\text{M}$  SAH nucleosidase, and were initiated with 1 mM dithionite. The reactions were carried out at room temperature in a buffer that contained 50 mM HEPES pH 7.5 and 0.25 M KCl. For reactions in which GLRX5 was included, 1 mM

reduced glutathione was also added. The respective data shown in panels **A**, **B** and **C** are averages from assays done in triplicate and the associated standard deviation error bars are shown in the respective data traces. The 6-thiooctanoyl intermediate data were fit to an exponential equation that accounts for its formation and decay phases (Figure 7A and 7B) while the lipoyl peptide product data were fit to a biphasic double exponential rate of formation equation respectively assuming a  $A \rightarrow B \rightarrow C$  model, as has previously been reported for *Mycobacterium tuberculosis* LipA <sup>72</sup>.

**Table S3:** MRM fragmentation products monitored by LC-MS.

| <b>Compound</b>                                | <b>Parent ion*</b> | <b>Product ion 1<sup>§</sup></b> | <b>Product ion 2<sup>§</sup></b> |
|------------------------------------------------|--------------------|----------------------------------|----------------------------------|
| lipoyl peptide                                 | 700.2 (211)        | 274.1 (36)                       | 84 (68)                          |
| <sup>32</sup> S/ <sup>34</sup> S lipoy peptide | 702.2 (211)        | 276.1 (36)                       | 84 (68)                          |
| <sup>34</sup> S/ <sup>34</sup> S lipoy peptide | 704.2 (211)        | 278.1 (36)                       | 84 (68)                          |
| monothiolated peptide                          | 668.2 (211)        | 242.1 (32)                       | 84 (68)                          |
| <sup>34</sup> S monothiolated peptide          | 670.2 (211)        | 244.1 (32)                       | 84 (68)                          |
| octanoyl peptide                               | 636.3 (196)        | 210.1 (32)                       | 84 (60)                          |
| AtsA peptide                                   | 474.4 (112)        | 229.1 (18)                       | 153 (26)                         |

\*Respective fragmentor voltage in parenthesis

§ Respective collision energies in parenthesis

**Table S4:** LC-MS gradient conditions for the analysis of LIAS reaction products

| <b>Time (min)</b> | <b>0.1% Formic acid in water</b> | <b>Acetonitrile</b> | <b>Flow rate (mL/min)</b> |
|-------------------|----------------------------------|---------------------|---------------------------|
| 0                 | 98%                              | 2%                  | 0.3                       |
| 0.5               | 98%                              | 2%                  | 0.3                       |
| 2.5               | 35%                              | 65%                 | 0.3                       |
| 3.0               | 35%                              | 65%                 | 0.3                       |
| 4                 | 98%                              | 2%                  | 0.3                       |
| 5                 | 98%                              | 2%                  | 0.3                       |

## References

1. Steinthorsdottir, V.; Thorleifsson, G.; Reynisdottir, I.; Benediktsson, R.; Jonsdottir, T.; Walters, G. B.; Styrkarsdottir, U.; Gretarsdottir, S.; Emilsson, V.; Ghosh, S.; Baker, A.; Snorraddottir, S.; Bjarnason, H.; Ng, M. C.; Hansen, T.; Bagger, Y.; Wilensky, R. L.; Reilly, M. P.; Adeyemo, A.; Chen, Y.; Zhou, J.; Gudnason, V.; Chen, G.; Huang, H.; Lashley, K.; Doumatey, A.; So, W. Y.; Ma, R. C.; Andersen, G.; Borch-Johnsen, K.; Jorgensen, T.; van Vliet-Ostaptchouk, J. V.; Hofker, M. H.; Wijmenga, C.; Christiansen, C.; Rader, D. J.; Rotimi, C.; Gurney, M.; Chan, J. C.; Pedersen, O.; Sigurdsson, G.; Gulcher, J. R.; Thorsteinsdottir, U.; Kong, A.; Stefansson, K., A variant in CDKAL1 influences insulin response and risk of type 2 diabetes. *Nature genetics* **2007**, *39* (6), 770-5.
